# Supplementary material for: Phenolic Compounds Present Schinus terebinthifolius Raddi Influence the Lowering of Blood Pressure in Rats
Source: PubMed Central journal article supplement (PMC6151430; doi:10.3390/molecules22101792), 2017-10-23
Supplement: molecules-22-01792-s001.pdf [file molecules-22-01792-s001.pdf]

1 Supplementary Materials

2 **Phenolic compounds in *Schinus terebinthifolius***  
3 **Raddi influence the lowering of blood pressure in**  
4 **rats**

5 **Lorena de Lima Glória <sup>1</sup>, Mariana Barreto de Souza Arantes <sup>1</sup>, Silvia Menezes de Faria Pereira <sup>1</sup>,**  
6 **Guilherme de Souza Vieira <sup>2</sup>, Camilla Xavier Martins <sup>2</sup>, Almir Ribeiro de Carvalho Junior <sup>3</sup>,**  
7 **Fernanda Antunes <sup>2</sup>, Raimundo Braz-Filho <sup>3</sup>, Ivo José Curcino Vieira <sup>3</sup>, Larissa Leandro da Cruz <sup>1</sup>,**  
8 **Douglas Siqueira de Almeida Chaves <sup>4</sup>, Silvério de Paiva Freitas <sup>5</sup> and Daniela Barros de Oliveira**  
9 **<sup>1,\*</sup>**

10 <sup>1</sup> Laboratório de Tecnologia de Alimentos, CCTA, Universidade Estadual do Norte Fluminense Darcy  
11 Ribeiro, Campos dos Goytacazes, RJ 28013-602, Brazil; lorena\_limagloria@hotmail.com (L.d.L.G.);  
12 mariana.arant@yahoo.com.br (M.B.d.S.A.); silvia@uenf.br (S.M.d.F.P.); larissa.leandrocruz@gmail.com  
13 (L.L.d.C.); dbarrosoliveira@uenf.br (D.B.d.O.)

14 <sup>2</sup> Laboratório de Clínica e Cirurgia Animal, CCTA, Universidade Estadual do Norte Fluminense Darcy  
15 Ribeiro, Campos dos Goytacazes, RJ 28013-602, Brazil; guilhermesv.medvet@gmail.com (G.d.S.V.);  
16 camilla.xm@gmail.com (C.X.M.); prfernandaantunes@yahoo.com.br (F.A.)

17 <sup>3</sup> Laboratório de Ciências Químicas, CCT, Universidade Estadual do Norte Fluminense Darcy Ribeiro,  
18 Campos dos Goytacazes, RJ 28013-602, Brazil; almir@uenf.br (A.R.d.C.J.); braz@uenf.br (R.B.-F.);  
19 curcino@uenf.br (I.J.C.V.)

20 <sup>4</sup> Laboratório de Química de Bioativos Naturais, Departamento de Ciências Farmacêuticas, Universidade  
21 Federal Rural do Rio de Janeiro, RJ, Brazil chavesdsa@yahoo.com.br (D.S.d.A.C.)

22 <sup>5</sup> Laboratório de Fitotecnia, Universidade Estadual do Norte Fluminense Darcy Ribeiro, Campos dos  
23 Goytacazes, RJ 28013-602, Brazil; silverio@uenf.br (S.d.P.F.)

24 \* Correspondence: dbarrosoliveira@uenf.br; Tel.: +55-22-27486517

25  
26  
27  
28  
29  
30  
31  
32  
33  
34  
35  
36  
37  
38  
39  
40  
41  
42

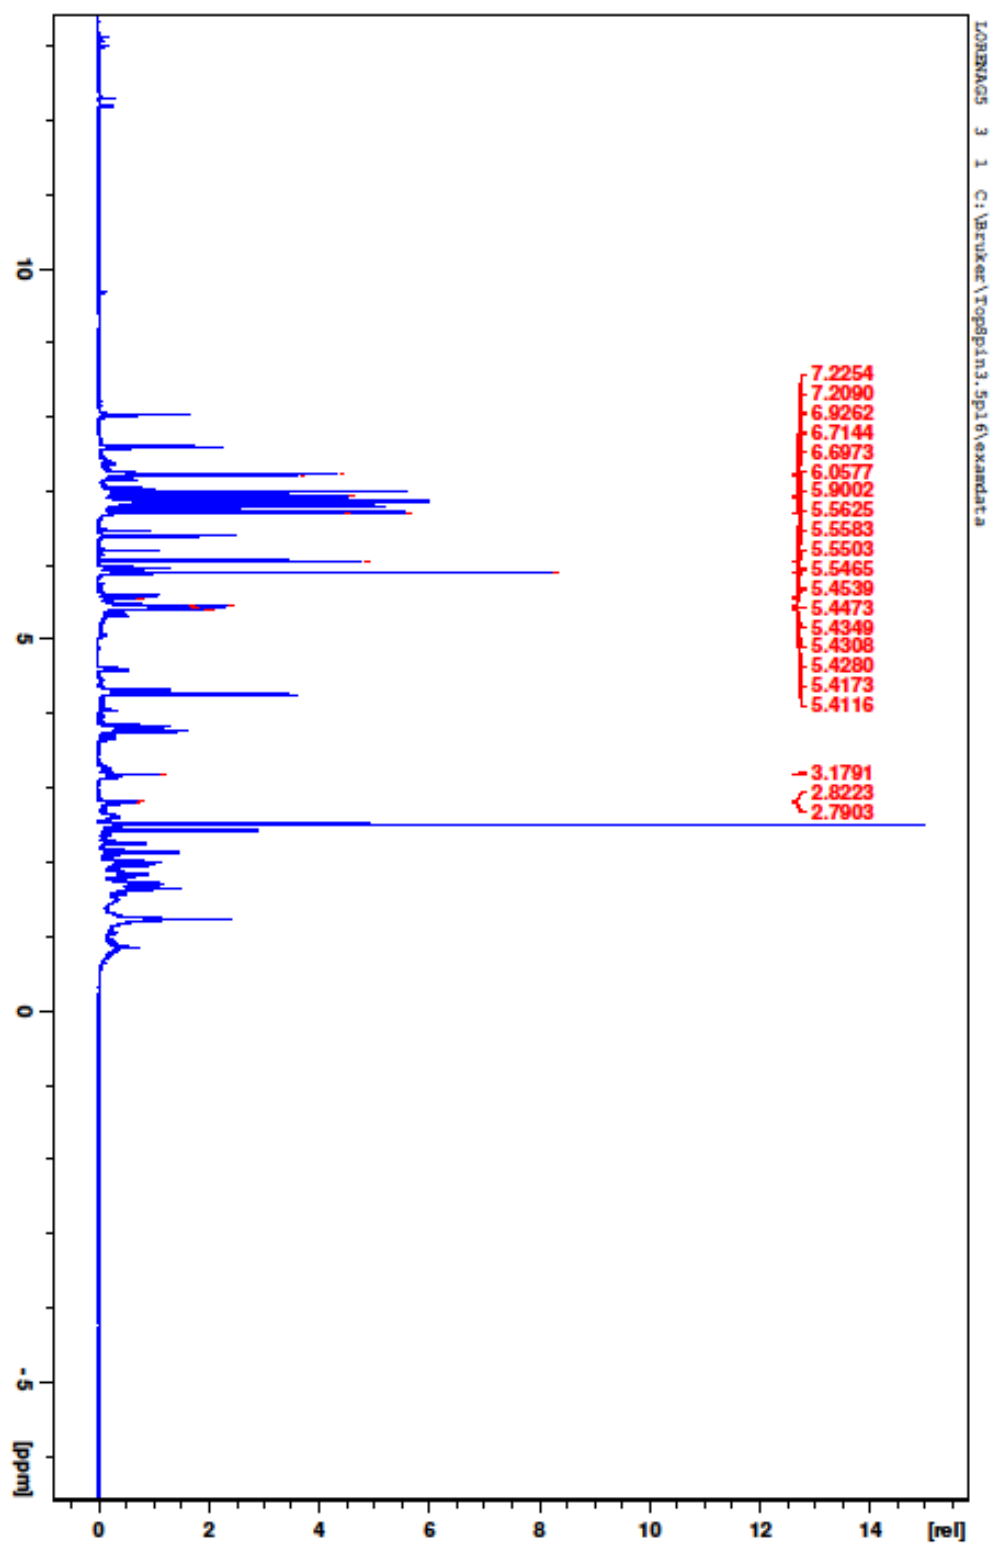

43

44

**Figure S1:**  $^1\text{H}$  NMR spectrum of compound **1** and **2** ( $\text{DMSO}-d_6$ , 500 MHz).

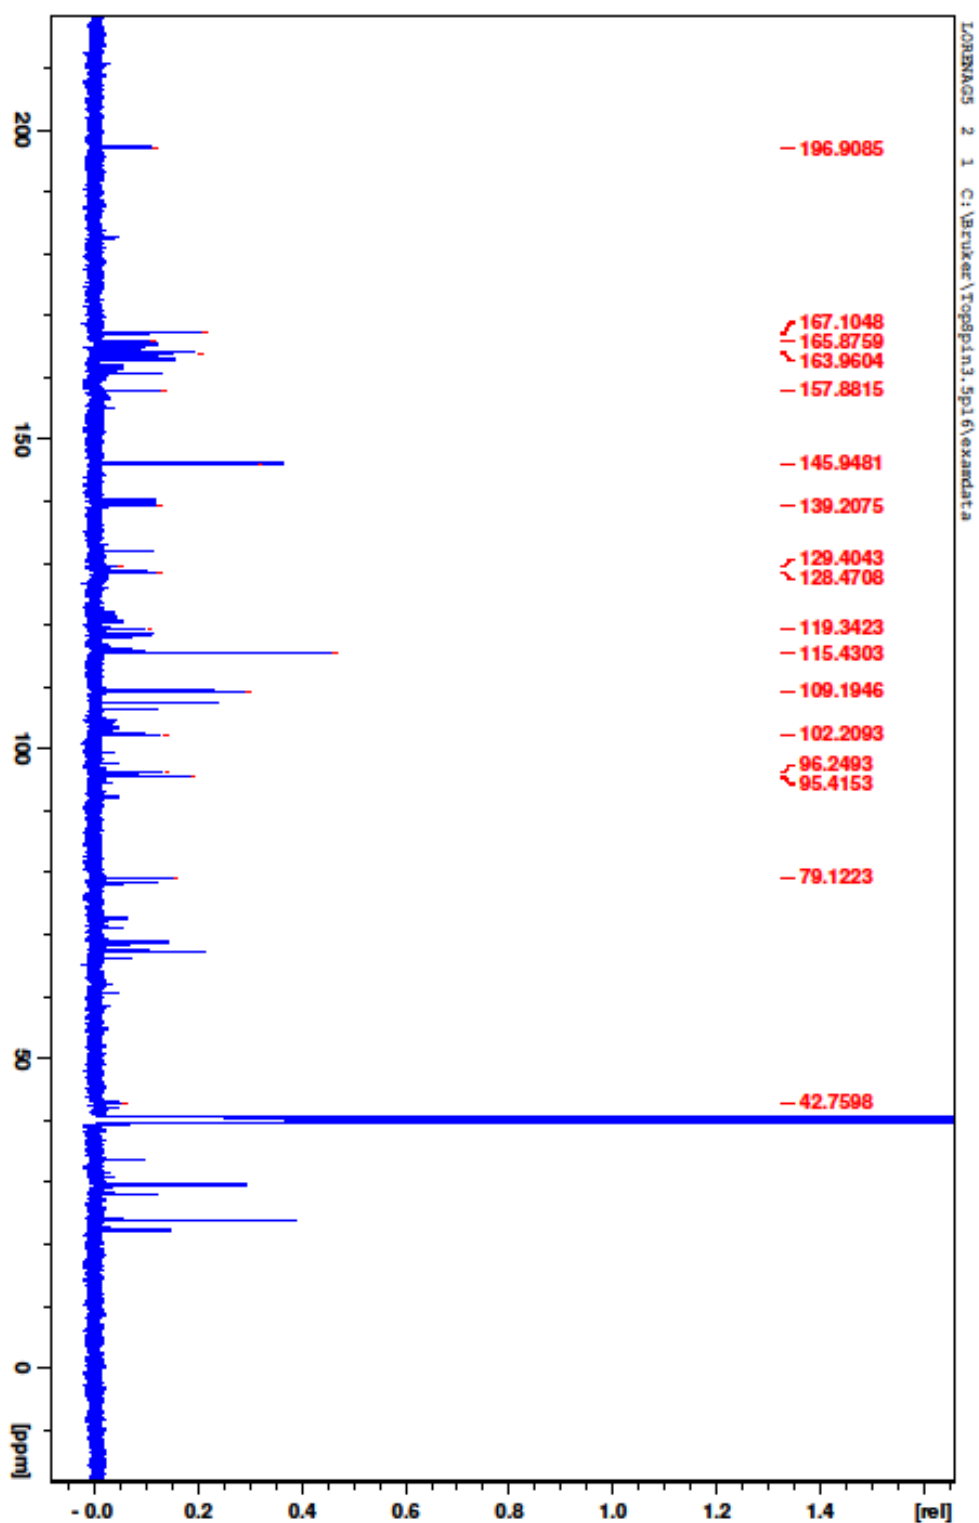

45  
46

**Figure S2:** <sup>13</sup>C NMR spectrum of compound 1 and 2 (DMSO-*d*<sub>6</sub>, 125 MHz).

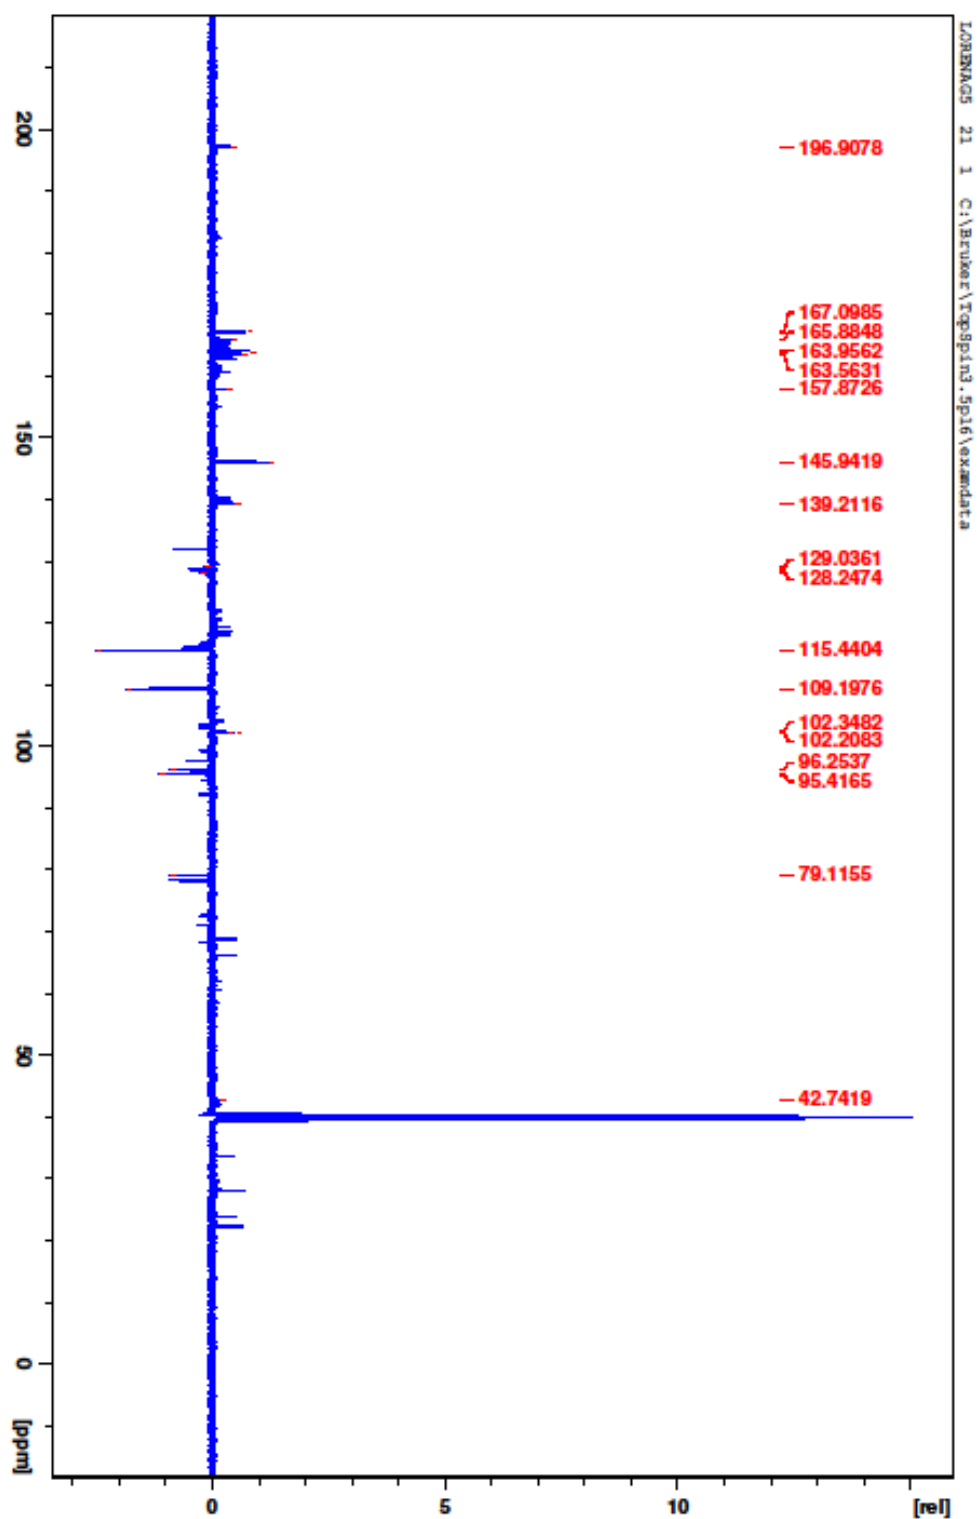

47

48

**Figure S3:**  $^{13}\text{C}$  DEPTQ NMR spectrum of compound **1** and **2** (DMSO- $d_6$ , 125 MHz).



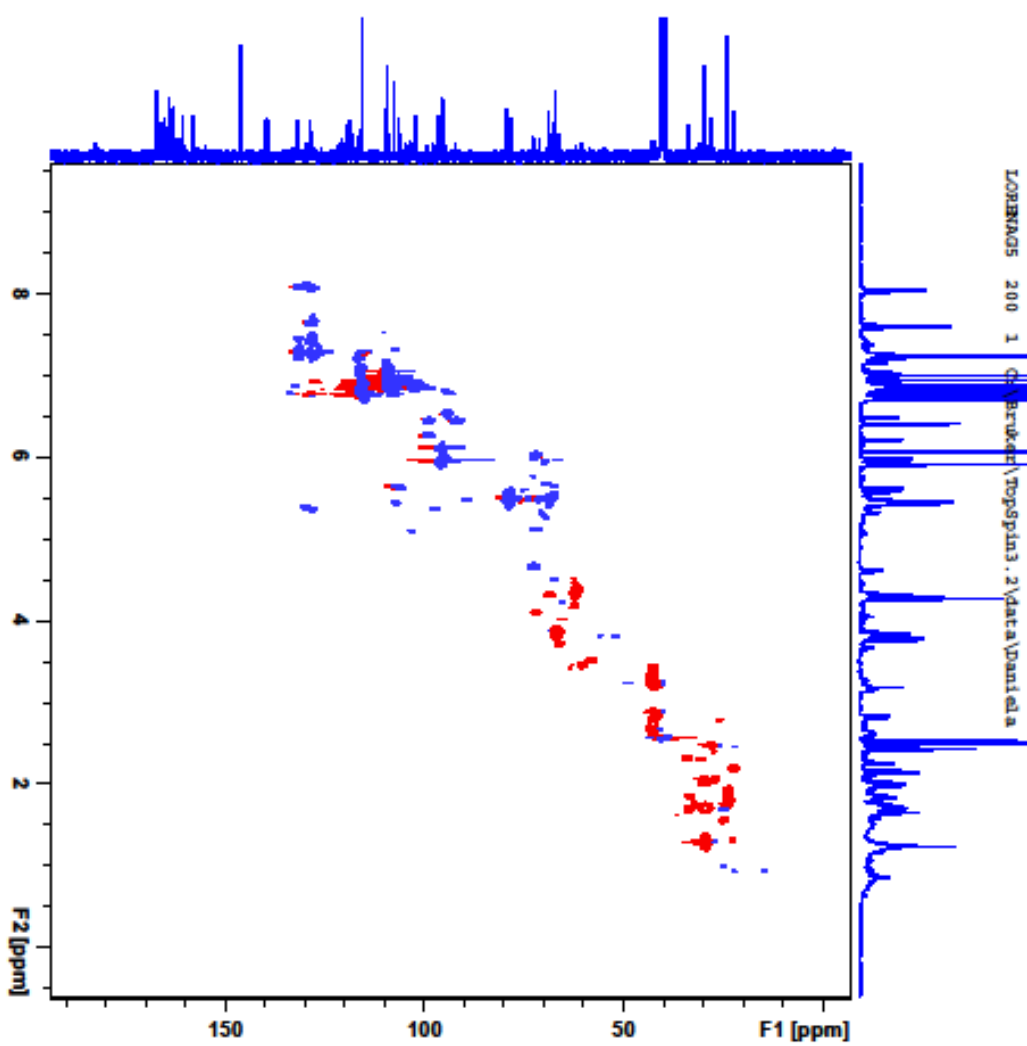

51  
52

**Figure S5:** HSQC spectrum of compound **1** and **2** (DMSO-*d*<sub>6</sub>, 500 MHz).

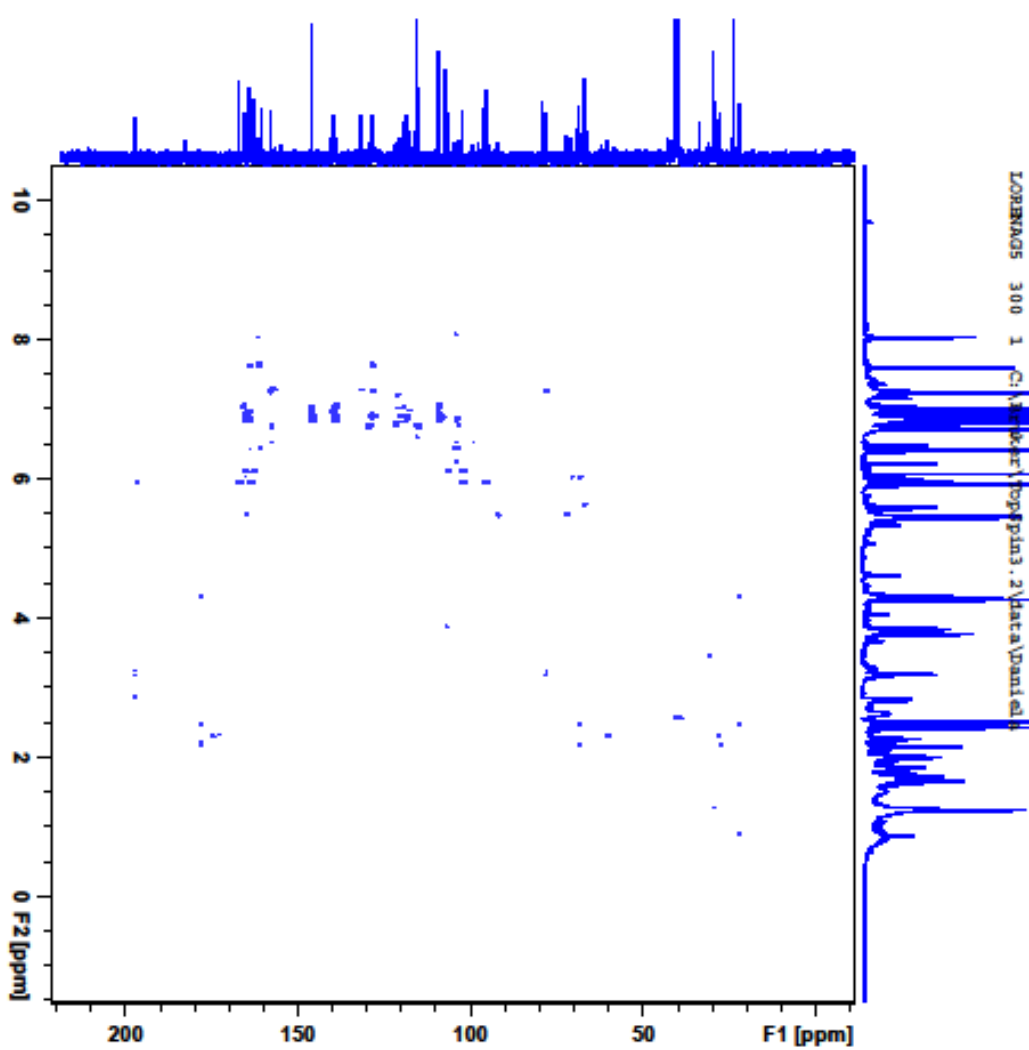

53  
54  
55  
56  
57  
58  
59  
60  
61  
62

**Figure S6:** HMBC spectrum of compound **1** and **2** (DMSO-*d*<sub>6</sub>, 500 MHz).

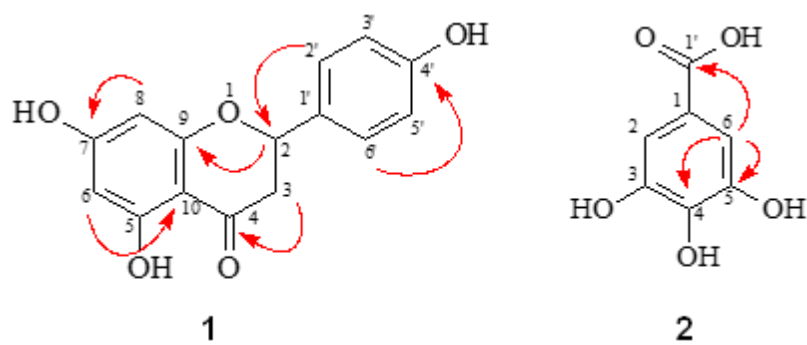

63

64 **Figure S7:** Structures of compound **1** and **2** assembled with the aid of COSY correlations.
